# Supplementary material for: Evaluating the influence of common antibiotics on the efficacy of a recombinant immunotoxin in tissue culture
Source: PubMed Central journal article supplement (PMC6537151; doi:10.1186/s13104-019-4337-6), 2019-05-27
Supplement: 13104_2019_4337_MOESM5_ESM.pdf [file 13104_2019_4337_MOESM5_ESM.pdf]

**Additional file 5. Antibiotic cytotoxicity EC<sub>50</sub> values (mM).**

| <b>Antibiotic</b> | <b>HEK293</b>        | <b>OVCAR8</b>        | <b>CA46</b>          | <b>Ramos</b> | <b>Raji</b> |
|-------------------|----------------------|----------------------|----------------------|--------------|-------------|
| Chloramphenicol   | ~0.8                 | ~1.0                 | ~1.4                 | ~0.6         | ~0.7        |
| Tetracycline      | ~0.6                 | >1.0                 | No toxicity observed | -            | -           |
| Fusidic Acid      | 0.171                | 0.181                | 0.145                | -            | -           |
| Kanamycin         | No toxicity observed | No toxicity observed | No toxicity observed | -            | -           |
| Linezolid         | ~0.5                 | No toxicity observed | No toxicity observed | -            | -           |
| Streptomycin      | No toxicity observed | No toxicity observed | No toxicity observed | -            | -           |
