# Supplementary material for: Evaluating the influence of common antibiotics on the efficacy of a recombinant immunotoxin in tissue culture
Source: PubMed Central journal article supplement (PMC6537151; doi:10.1186/s13104-019-4337-6), 2019-05-27
Supplement: 13104_2019_4337_MOESM6_ESM.pdf [file 13104_2019_4337_MOESM6_ESM.pdf]

**Additional file 6. Maximum antibiotic concentrations evaluated.**

| <b>Antibiotic</b> | <b>[Maximum] (mM)</b> |
|-------------------|-----------------------|
| Chloramphenicol   | 1.5                   |
| Tetracycline      | 1.0                   |
| Fusidic Acid      | 1.0                   |
| Kanamycin         | 1.0                   |
| Linezolid         | 0.5                   |
| Streptomycin      | 0.3                   |
