# Supplementary material for: Evaluating the influence of common antibiotics on the efficacy of a recombinant immunotoxin in tissue culture
Source: PubMed Central journal article supplement (PMC6537151; doi:10.1186/s13104-019-4337-6), 2019-05-27
Supplement: 13104_2019_4337_MOESM10_ESM.pdf [file 13104_2019_4337_MOESM10_ESM.pdf]

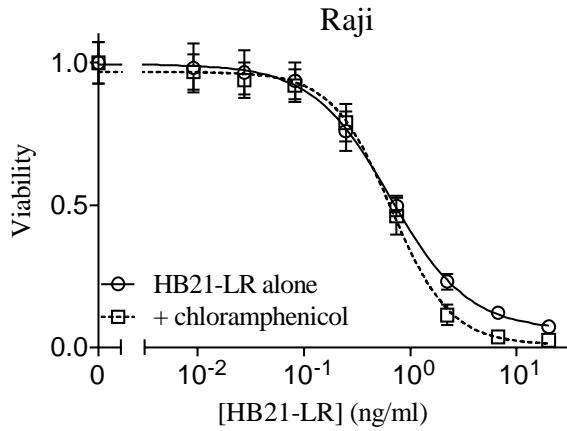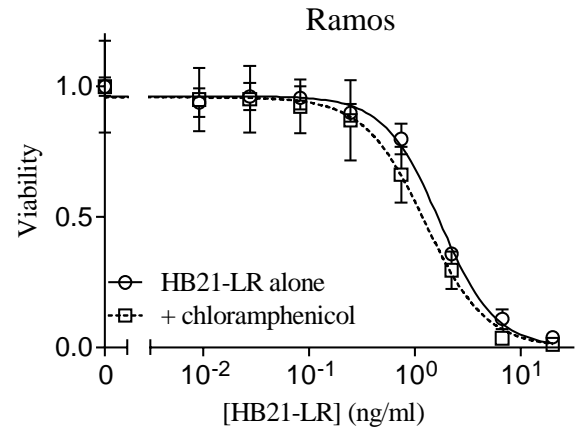

**Additional file 10. Raji and Ramos survival in response to chloramphenicol/RIT combination treatment.** Survival of cells Raji and Ramos cells was evaluated in response to combination treatment with chloramphenicol and HB21-LR. Antibiotic concentrations are shown in Table 1. Each combination was evaluated at least three times. Representative graphs comparing HB21-LR alone to HB21-LR with chloramphenicol are shown here. Error bars indicate standard error of six replicates. Data were fit to a four-parameter sigmoid function.
